# Supplementary material for: Seasonal and Spatial Variations in Synechococcus Abundance and Diversity Throughout the Gullmar Fjord, Swedish Skagerrak
Source: Front Microbiol. 2022 May 9;13:828459. doi: 10.3389/fmicb.2022.828459 (PMC9125215; doi:10.3389/fmicb.2022.828459)
Supplement: Supplementary file 2 [file Table_2.XLSX]

## Sheet: Supplementary Table S2
Supplemental Table S2. Sequence Table of total Synechococcus, Cyanobacteria, and total bacteria 16S rRNA V3-V4 reads at each station/depth/time point in the study. Additionally, proportion of Synechococcus to cyanobacterial and total bacteria are shown.
Dataset	Date/Cruise	Station	Depth	Replicate	Syn-Reads	Cyano-Reads	Total-Reads	Syn%Total	OC%Total
Timeseries	2016-05-18	Pricken	2-10	1	618	777	70199	0.880354	0.226499
Timeseries	2016-06-02	Pricken	2-10	1	1601	1638	38054	4.20718	0.0972303
Timeseries	2016-06-14	Pricken	2-10	1	33472	33534	71965	46.5115	0.086153
Timeseries	2016-06-29	Pricken	2-10	1	36732	36907	105335	34.8716	0.166137
Timeseries	2016-07-25	Pricken	2-10	1	11992	12096	127872	9.37813	0.0813313
Timeseries	2016-02-23	Pricken	2-10	1	627	742	55882	1.12201	0.205791
Timeseries	2016-02-24	Pricken	2-10	1	189	266	125173	0.150991	0.0615149
Timeseries	2016-03-03	Pricken	2-10	1	162	180	12757	1.26989	0.141099
Timeseries	2016-03-30	Pricken	2-10	1	183	262	17361	1.05409	0.455043
Timeseries	2016-05-05	Pricken	2-10	1	1878	2139	34085	5.50976	0.765733
Timeseries	2016-07-12	Pricken	2-10	1	22350	23359	198027	11.2863	0.509526
Timeseries	2016-03-14	Pricken	2-10	1	1567	1880	189653	0.826246	0.165038
Timeseries	2016-04-11	Pricken	2-10	1	430	539	83397	0.515606	0.1307
Timeseries	2016-08-16	Pricken	2-10	1	3675	3910	41842	8.78304	0.561637
Timeseries	2016-08-23	Pricken	2-10	1	32067	32222	128568	24.9417	0.120559
Timeseries	2016-09-20	Pricken	2-10	1	31219	31382	162653	19.1936	0.100213
Timeseries	2016-10-10	Pricken	2-10	1	2990	3086	105732	2.8279	0.0907956
Timeseries	2017-01-27	Pricken	2-10	1	1692	1812	36155	4.67985	0.331904
Timeseries	2016-11-09	Pricken	2-10	1	660	734	156580	0.42151	0.0472602
Timeseries	2016-09-05	Pricken	2-10	1	22568	22723	126871	17.7881	0.122171
Timeseries	2016-12-12	Pricken	2-10	1	370	525	59709	0.619672	0.259592
Timeseries	2017-01-09	Pricken	2-10	1	359	680	5432	6.60898	5.90943
Timeseries	2017-01-25	Pricken	2-10	1	529	1947	170554	0.310166	0.831408
Timeseries	2017-03-08	Pricken	2-10	1	393	604	106247	0.369893	0.198594
Timeseries	2017-03-21	Pricken	2-10	1	265	964	107049	0.24755	0.652972
Transects	KB1707	S1	1	1	342	378	2323	14.7223	0.0154972
Transects	KB1707	S1	1	2	17518	20801	130684	13.4049	0.0251217
Transects	KB1707	S1	1	3	8046	9853	95388	8.43502	0.0189437
Transects	KB1707	S1	1	4	16086	19692	184054	8.73983	0.0195921
Transects	KB1707	S7	2	1	347	347	847	40.9681	0
Transects	KB1707	S7	2	2	68023	68182	88265	77.0668	0.00180139
Transects	KB1707	S7	13	1	32306	32408	71829	44.9763	0.00142004
Transects	KB1707	S7	13	2	11303	12098	174672	6.47099	0.00455139
Transects	KB1707	S7	30	1	6843	7275	122363	5.59238	0.00353048
Transects	KB1707	S7	30	2	15671	15763	38359	40.8535	0.00239839
Transects	KB1707	S6	5	1	43080	43733	104802	41.1061	0.0062308
Transects	KB1707	S6	5	2	51902	52288	88679	58.5279	0.00435278
Transects	KB1707	S6	12	1	16296	16308	49966	32.6142	0.000240163
Transects	KB1707	S6	12	2	29892	29947	94014	31.7953	0.000585019
Transects	KB1707	S6	30	1	3231	3250	91167	3.54405	0.000208409
Transects	KB1707	S6	30	2	3795	3850	94025	4.03616	0.000584951
Transects	KB1707	S6	PUMP	1	39448	39877	65157	60.543	0.0065841
Transects	KB1707	S6	PUMP	2	36204	36914	81902	44.204	0.0086689
Transects	KB1707	S5	5	1	37498	37736	59563	62.9552	0.00399577
Transects	KB1707	S5	5	2	51059	51238	78909	64.7062	0.00226844
Transects	KB1707	S5	14	1	26973	27010	68201	39.5493	0.000542514
Transects	KB1707	S5	14	2	16618	16646	40440	41.093	0.000692384
Transects	KB1707	S5	80	1	713	739	59525	1.19782	0.000436791
Transects	KB1707	S4	50	1	110119	110177	246577	44.6591	0.000235221
Transects	KB1707	S4	15	1	1515	1628	61352	2.46936	0.00184183
Transects	KB1707	S4	15	2	68	68	355	19.1549	0
Transects	KB1707	S4	5	1	1166	1185	4126	28.2598	0.00460494
Transects	KB1707	S4	5	2	311	314	1673	18.5894	0.00179319
Transects	KB1707	S5	50	1	2383	2533	63903	3.72909	0.00234731
Transects	KB1707	S5	50	2	858	902	33731	2.54365	0.00130444
Transects	KB1707	S5	80	2	791	803	50490	1.56665	0.000237671
Transects	KB1707	S4	50	2	35271	35282	77702	45.3927	0.000141566
Transects	KB1707	S4	75	1	897	917	64609	1.38835	0.000309554
Transects	KB1707	S4	75	2	105	105	2403	4.36954	0
Transects	KB1707	S4	100	1	560	579	44042	1.27151	0.000431406
Transects	KB1707	S4	100	2	187	187	8798	2.12548	0
Transects	KB1707	S3	5	1	38197	38504	58239	65.5866	0.00527138
Transects	KB1707	S3	5	2	9985	10056	12192	81.898	0.00582349
Transects	KB1707	S3	14	1	17514	17518	31638	55.3575	0.00012643
Transects	KB1707	S3	14	2	1510	1513	3560	42.4157	0.000842697
Transects	KB1707	S3	50	1	94	96	955	9.84293	0.00209424
Transects	KB1707	S3	50	2	340	364	13329	2.55083	0.00180059
Transects	KB1707	S3	70	1	506	514	23653	2.13926	0.000338223
Transects	KB1707	S3	70	2	1010	1051	48455	2.08441	0.000846146
Transects	KB1707	S2	5	1	70	70	187	37.4332	0
Transects	KB1707	S2	5	2	13846	13873	18270	75.7854	0.00147783
Transects	KB1707	S2	14	1	43917	44122	79874	54.9828	0.00256654
Transects	KB1707	S2	14	2	27975	27976	56973	49.1022	1.75522e-05
Transects	KB1707	S2	50	1	1631	1702	36111	4.51663	0.00196616
Transects	KB1707	S2	50	2	1197	1306	44821	2.67062	0.0024319
Transects	KB1709	S1	1	1	11168	15277	98290	11.3623	0.0418049
Transects	KB1709	S1	1	2	10448	11097	76254	13.7016	0.00851103
Transects	KB1709	S7	5	1	2434	2434	6242	38.9939	0
Transects	KB1709	S7	5	2	405	416	8278	4.89249	0.00132882
Transects	KB1709	S7	13	1	4125	4222	29755	13.8632	0.00325996
Transects	KB1709	S7	13	2	75	75	354	21.1864	0
Transects	KB1709	S7	30	1	1456	1456	20782	7.00606	0
Transects	KB1709	S7	30	2	7179	7211	92123	7.79284	0.000347362
Transects	KB1709	S6	5	1	9139	9160	97778	9.34668	0.000214772
Transects	KB1709	S6	5	2	15955	16757	100132	15.934	0.00800943
Transects	KB1709	S6	10	1	14418	15747	106540	13.5329	0.0124742
Transects	KB1709	S6	10	2	71	71	205	34.6341	0
Transects	KB1709	S6	30	1	1802	1802	55457	3.24936	0
Transects	KB1709	S6	30	2	4267	4280	96766	4.40961	0.000134345
Transects	KB1709	S4	25	1	102	105	9780	1.04294	0.000306748
Transects	KB1709	S4	25	2	59	59	4108	1.43622	0
Transects	KB1709	S4	2	1	3463	3484	79510	4.35543	0.000264118
Transects	KB1709	S4	2	2	185	185	490	37.7551	0
Transects	KB1709	S4	7	1	13821	13867	119016	11.6127	0.000386503
Transects	KB1709	S4	7	2	6412	6436	42922	14.9387	0.000559154
Transects	KB1709	S4	55	1	118	125	14892	0.792372	0.000470051
Transects	KB1709	S4	55	2	124	134	25911	0.478561	0.000385936
Transects	KB1709	S4	75	1	459	475	70123	0.654564	0.000228171
Transects	KB1709	S4	75	2	36	36	2873	1.25305	0
Transects	KB1709	S3	5	1	4687	4753	67438	6.95009	0.000978677
Transects	KB1709	S3	5	2	6863	7095	52901	12.9733	0.00438555
Transects	KB1709	S3	14	1	548	566	43618	1.25636	0.000412674
Transects	KB1709	S3	14	2	990	1073	82375	1.20182	0.00100759
Transects	KB1709	S5	7	1	7771	7879	100511	7.73149	0.00107451
Transects	KB1709	S5	7	2	22097	22237	159232	13.8772	0.00087922
Transects	KB1709	S5	15	1	1883	1999	67605	2.7853	0.00171585
Transects	KB1709	S5	15	2	1306	1344	47553	2.74641	0.000799108
Transects	KB1709	S5	55	1	521	552	53458	0.974597	0.000579894
Transects	KB1709	S5	55	2	230	237	31372	0.733138	0.000223129
Transects	KB1709	S5	2	1	11849	11972	105951	11.1835	0.00116091
Transects	KB1709	S5	2	2	3474	3524	17952	19.3516	0.0027852
Transects	KB1709	S2	3	1	2239	2298	46080	4.85894	0.00128038
Transects	KB1709	S2	3	2	845	934	68616	1.23149	0.00129707
Transects	KB1709	S2	12	1	472	506	26943	1.75185	0.00126192
Transects	KB1709	S2	12	2	2846	2915	49598	5.73813	0.00139119
Transects	KB1709	S2	50	1	52	52	5675	0.9163	0
Transects	KB1709	S2	50	2	22	22	739	2.977	0
Transects	KB1709	S3	50	1	1851	2052	409108	0.452448	0.000491313
Transects	KB1709	S3	50	2	85	95	22101	0.384598	0.000452468
Transects	KB1709	S3	70	1	766	766	49843	1.53683	0
Transects	KB1709	S3	70	2	598	615	87076	0.686756	0.000195232
Transects	KB1709	S4	100	1	97	107	24792	0.391255	0.000403356
Transects	KB1709	S4	100	2	74	82	22110	0.33469	0.000361827
Transects	KB1709	Control		1	853	873	26558	3.21184	0.000753069
Transects	KB1709	Control		2	681	684	22151	3.07435	0.000135434
Transects	KB1709	Control		3	438	458	45485	0.962955	0.000439705
Transects	KB1709	Control		4	362	372	34309	1.05512	0.000291469
Transects	KB1709	S6	PUMP	1	5531	10450	128222	4.31361	0.0383632
Transects	KB1709	S6	PUMP	2	39	77	602	6.47841	0.0631229
Total					1158040	1186381	7964473
Total-Transects					949452	971473	5627321
Total-Timeseries					208588	214908	2337152
Average					10030	10269.7	65947.4	16.1839	0.102335
Max					110119	110177	409108
Min					22	22	187
